# Supplementary material
Source: PubMed Central journal article supplement (PMC7050103)
Supplement: 156115_1_supp_443018_q2dbbb.pdf [file 156115_1_supp_443018_q2dbbb.pdf]

## Supplemental Table 4

| Gene name       | Baits     |           |         |         |         |         |       |       |
|-----------------|-----------|-----------|---------|---------|---------|---------|-------|-------|
|                 | Artemis_1 | Artemis_2 | ENTR1_1 | ENTR1_2 | UBE2O_1 | UBE2O_2 | DCT_1 | DCT_2 |
| AMPK $\alpha$ 1 | 197       | 173       | 31      | 30      | 3       | 5       | 0     | 1     |
| AMPK $\alpha$ 2 | 204       | 202       | 16      | 27      | 7       | 12      | 3     | 4     |
| AMPK $\beta$ 1  | 75        | 67        | 12      | 9       | 1       | 5       | 3     | 1     |
| AMPK $\beta$ 2  | 51        | 37        | 10      | 5       | 0       | 0       | 0     | 0     |
| AMPK $\gamma$ 1 | 150       | 131       | 26      | 30      | 7       | 8       | 3     | 0     |
| AMPK $\gamma$ 2 | 33        | 31        | 5       | 7       | 0       | 0       | 0     | 0     |
